# Supplementary material for: Fog Computing-Based Smart Consumer Recommender Systems
Source: MDPI journal article supplement (doi:10.3390/jtaer19010032), 2024-03-11
Supplement: s1 [file s1]

## **Fog Computing-Based Smart Consumer Recommender Systems**

|                                                                         |    |
|-------------------------------------------------------------------------|----|
| Web Appendix A: Fog Computing Benefits.....                             | 2  |
| Web Appendix B: Summary Comparison Between Cloud and Fog Computing..... | 4  |
| Web Appendix C: Affective FC for Marketing.....                         | 5  |
| Web Appendix D: FC Selected Publications.....                           | 10 |

These materials have been supplied by the authors to aid in the understanding of their paper.

### **Web Appendix A: Fog Computing Benefits**

*Reduced latency:* Processing devices, if placed closer to user devices, reduce latency as physical distance is reduced, resulting in faster response times.

*Energy efficiency:* Instead of sensors actually working all the time, gateways can act as communication proxies, which can handle any request when sensors are on sleep mode and resume processing when they wake up. This is how energy efficiency can be improved within sensor devices.

*Bandwidth:* Instead of sending large chunks of raw data to a data center, they can be processed at fog nodes, so as to reduce the volume of data transmitted to the center.

*Privacy:* Propagation of data can be reduced by means of fog computing by virtue of which sensitive data can be analyzed at local gateway rather than at a data center that is not in control of the user, so as to ensure user data privacy.

### **Advantages**

*Contextual location awareness and low latency:* Fog computing offers the lowest possible latency due to fog nodes' awareness of their logical location in the context of the entire system and of the latency costs entailed in communicating with other nodes. The origins of fog computing can be traced to early proposals supporting endpoints with rich services at the edge of the network, including applications with low latency requirements. Because fog nodes are often co-located with smart end-devices, analysis and response to data generated by these devices is much quicker than from a centralized cloud service or data center.

*Geographical distribution:* In sharp contrast to the more centralized cloud, the services and applications targeted by fog computing demand widely, but geographically identifiable,

distributed deployments. For instance, fog computing will play an active role in delivering high quality streaming services to moving vehicles through proxies and access points geographically positioned along highways and tracks.

*Heterogeneity:* Fog computing supports collection and processing of data of different form factors acquired through multiple types of network communication capabilities.

*Interoperability and federation:* Seamless support of certain services (e.g., real-time streaming services) requires the cooperation of different providers. Hence, fog computing components must be able to interoperate, and services must be federated across domains.

*Real-time interactions:* Fog computing applications involve real-time interactions rather than batch processing.

*Scalability and agility of federated fog-node clusters:* Fog computing is adaptive in nature, at the cluster or cluster-of-clusters level, supporting elastic computing, resource pooling, data-load changes, and network condition variations, to mention a few supported adaptive functions.

*Predominance of wireless access:* Although fog computing is used in wired environments, the large scale of wireless sensors in IoT demands distributed analytics and computing. For this reason, fog computing is very well suited to wireless IoT access networks.

*Support for mobility:* It is essential for many fog computing applications to communicate directly with mobile devices, and therefore support mobility techniques, such as the Locator/ID Separation Protocol (LISP) 10, which decouple host identity from location identity, and require a distributed directory system.

### Web Appendix B: Summary Comparison Between Cloud and Fog Computing

Summary Comparison Between Cloud and Fog Computing:

| <b>Requirement</b>                             | <b>Cloud Computing</b>    | <b>Fog Computing</b> |
|------------------------------------------------|---------------------------|----------------------|
| <i>Latency and Jitter</i>                      | High/Medium               | Low                  |
| <i>Location of Service</i>                     | Within Internet           | Network Edge         |
| <i>Distance Between Data Sources/Consumers</i> | Multiple Hops             | Single Hop           |
| <i>Location Awareness</i>                      | No                        | Yes                  |
| <i>Computation Cost</i>                        | High                      | Very low             |
| <i>Security</i>                                | Less than Fog             | More than Cloud      |
| <i>Geo-Distribution</i>                        | Centralized (Data Center) | Distributed          |
| <i>Number of Nodes</i>                         | Large                     | Larger               |
| <i>Support for Mobility</i>                    | No                        | Yes                  |
| <i>Data Analytics</i>                          | Data at Rest              | Data in Motion       |
| <i>Connectivity</i>                            | Wireline                  | Wireless             |

### **Web Appendix C: Affective FC for Marketing**

With the rapid and ubiquitous acceptance of new technologies, algorithms will be used to estimate new measures of mental state and behavior based on digital data. The algorithms will analyze data collected from sensors in smartphones and wearable technology, the internet and smartphone usage and activities. FC will be used to analyze the collected data to estimate consumers' mental and behavior states (Glenn and Monteith 2014). Indeed, with the increasing integration of technology into humans' daily lives, digital emotions have become an important aspect of human-computer interaction and online experiences. Digital emotions can encompass a wide range of emotions, including happiness, sadness, anger, fear, and surprise. Consumers express their emotions in various ways to marketing stimuli through text-based messages, emojis, gifs, images, videos, etc. These expressions can convey tone, mood, and intention, allowing consumers to communicate their emotional states and reactions to others. Also, FC may help to prevent the frequent and extensive lag between monitoring emotions and monitoring behavior, which is of particular importance to marketing management, as earlier monitoring may lead to better outcomes in terms of consumer persuasion. Smart service technologies, including both hardware and software, in combination with intelligent automation (IA) have become more powerful, cheaper, and easier to implement and use. They have the potential to bring unprecedented improvements in customer service, service quality, and productivity all at the same time. Thus, FC will be able to combine ubiquitous computing, affective computing, and the contributions of context-aware information to provide more accurate and intelligent consumer information. As technology evolves, FC may incorporate mobile robots, nano particles, and dynamic avatars, which might populate the commercial environment.

It is important to note that digital emotions may not always accurately reflect an individual's true emotional state. Online interactions often lack nonverbal cues, such as facial expressions and body language, which can limit the depth and accuracy of emotional communication. Additionally, people may also modify or mask their emotions in digital environments due to social norms, privacy concerns, or the desire to present a certain image or persona. To overcome these limitations researchers are working on advancing sophisticated affective computing, which aims to detect and interpret human emotions through facial recognition, voice analysis, and other physiological signals. Virtual reality and augmented reality applications are being designed to evoke emotional responses and create immersive emotional experiences. Also, deriving physiological data monitored by on-body sensors and wearable devices can be utilized to derive human emotion. Recently, an emotion derivation technique by wireless signal has been advanced in combination with heartbeat segmentation and respiration feature. Overall, there appears to be a significant trend of processing affective computing along with mobile robots, Internet of Things (IoT) devices, smart unmanned aerial vehicles (UAVs), physiological signals, photo plethysmogram (PPG), galvanic skin response (GSR), abdominal respiratory (AR), and thoracic respiratory (TR). Further, the LOSO (leave-one-subject-out) method was incorporated to capture the impact variations in machine learning models (Glenn and Monteith, 2014).

## References

Glenn, Tasha, and Scott Monteith (2014), "New Measures of Mental State and Behavior Based on Data Collected from Sensors, Smartphones, and the Internet," *Current Psychiatry Reports*, 16 (12), 523, <https://doi.org/10.1007/s11920-014-0523-3>.

## **Affective Computing**

Affective computing is a multidisciplinary field that focuses on developing technologies capable of recognizing, interpreting, and responding to human emotions. It combines knowledge from various fields, such as computer science, psychology, cognitive science, and artificial intelligence, to create systems that can perceive and understand human affective states. Affective computing aims to offer a higher level of computational intelligence to marketing systems, which will enable emulation of consumers' affects and emotions. Those enhanced computing capabilities are currently in development as IT solutions. The framework is based on the affective computing as a service (ACaaS) solution, a system that is capable of processing text, image, gestures, and voice input files and extracting emotional information from them. Exploration of the combination of available FC technologies and affective computing objectives might support consumer research in this area by eliminating the need for researchers to build their own models. The goal of affective computing is to enable computers and other technological devices to recognize and appropriately respond to human emotions. This involves developing algorithms, models, and techniques to process and interpret different types of emotional cues, such as facial expressions, speech patterns, physiological signals, and even text-based data. Examples of emotion- and behavior-related research include: EmotionML, a proposed standard for an emotion markup language to allow software to respond to the detected emotional state of the user from the World Wide Web consortium (W3C); the Computer Expression Recognition Toolkit (CERT) for classifying emotions from facial expressions; Emotient and Affdex based on facial expression analysis; and Moodies based on voice analysis, which are currently being used to analyze customer emotional response; and NeuroSky and Emotiv, based on EEG, which optimize brain fitness. Research in affective computing is

expected to focus on advancing subtle, continuous, real-time, and context-specific interpretations of consumers' affective responses and on aggregating multiple modalities to improve results. A range of modalities for computer recognition of human emotion and behavior are envisioned. These include improving the effectiveness of targeted advertising, supported, for example, by IoT for emotional behavior recognition.

#### *Emotion synthesis*

Affective computing also focuses on generating emotional responses in machines. This can involve synthesizing expressive speech, generating appropriate facial expressions on avatars or robots, and producing emotionally responsive dialogue systems.

#### *Emotional interaction*

Affective computing aims to enable more natural and emotionally intelligent interactions between humans and machines. This includes developing systems that can adapt their behavior based on user emotions, providing empathetic responses, and understanding and responding to emotional cues during human-computer interactions.

#### *Human-computer interfaces*

Affective computing can improve the design and usability of human-computer interfaces by incorporating emotional feedback. For example, systems can adapt their behavior based on user frustration or engagement levels.

#### *Marketing and user experience*

Affective computing can be used to analyze user emotions and preferences, providing insights for personalized marketing strategies, product design, and improving user experience.

Progress in neuroscience and the appearance of nanomarketing and its more precise and less invasive techniques and tools promises to improve our understanding of the human brain and

its functioning. Thus, understanding consumers' unconscious reactions and emotions, and their influence on decision-making will increase marketing effectiveness and achieve marketing goals.

## Web Appendix D: FC Selected Publications

### ***Books***

Assad, Abbas, Samee U. Khan, and Albert Y. Zomaya (2020), *Fog Computing: Theory and Practice*. John Wiley & Sons.

Ravi, Tomar, Avita Katal, Susheela Dahiya, Niharika Singh, and Tanupriya Choudhury (2023), *Fog Computing: Concepts, Frameworks, and Applications*. CRC Press.

Rehan, Muhammad Maaz, and Mubashir Husain Rehmani (Eds.). (2020), *Blockchain-Enabled Fog and Edge Computing: Concepts, Architectures and Applications: Concepts, Architectures and Applications*. CRC Press.

Tanwar, Sudeep (ed.) (2021), *Fog Computing for Healthcare 4.0 Environments*. Springer International Publishing.

### ***Articles***

AboDoma, Noran, Eman Shaaban, and Ahmad Mostafa (2022), “Adaptive Time-Bound Access Control for Internet of Things in Fog Computing Architecture,” *International Journal of Computers and Applications*, 44 (8), 779-790.

Ahmadi, Zahra, Mostafa Haghi Kashani, Mohammad Nikravan, and Ebrahim Mahdipour (2021), “Fog-Based Healthcare Systems: A Systematic Review,” *Multimedia Tools and Applications*, 80, 36361-36400.

Aiswarya, S., K. Ramesh, S. Sasikumar, D. Sheema, and B. Prabha (2022), “Internet of Health Things: A Fog Computing Paradigm,” in *2022 6th International Conference on Trends in Electronics and Informatics (ICOEI)*, 598-604.

- AL-Amodi, Saeed, Sudhansu Shekhar Patra, Suman Bhattacharya, Jnyana Ranjan Mohanty, Vinay Kumar, and Rabindra Kumar Barik (2022), "Meta-Heuristic Algorithm for Energy-Efficient Task Scheduling in Fog Computing," in *Recent Trends in Electronics and Communication: Select Proceedings of VCAS 2020*, 915-925.
- Aliyu, Farouq, Tarek Sheltami, Mohamed Deriche, and Nidal Nasser (2022), "Human Immune-Based Intrusion Detection and Prevention System for Fog Computing," *Journal of Network and Systems Management* 30, 1-27.
- Alreshidi, Eissa Jaber (2022), "Introducing Fog Computing (FC) Technology to Internet of Things (IoT) Cloud-Based Anti-Theft Vehicles Solutions," *International Journal of System Dynamics Applications (IJSDA)*, 11 (3), 1-21.
- Alsadie, Deafallah (2022), "Task Scheduling in Fog Computing-Classification, Review, Challenges and Future Directions," *International Journal of Computer Science & Network Security*, 22 (4), 89-100.
- AlShathri, Samah Ibrahim, Samia Allaoua Chelloug, and Dina SM Hassan (2022), "Parallel Meta-Heuristics for Solving Dynamic Offloading in Fog Computing," *Mathematics*, 10 (8), 1258, <https://doi.org/10.3390/math10081258>.
- Alvi, Ahmad Naseem, Muhammad Awais Javed, Mozaherul Hoque Abul Hasanat, Muhammad Badruddin Khan, Abdul Khader Jilani Saudagar, Mohammed Alkhathami, and Umar Farooq (2022), "Intelligent Task Offloading in Fog Computing Based Vehicular Networks," *Applied Sciences*, 12 (9), 4521, <https://doi.org/10.3390/app12094521>.

- Al-Zinati, Mohammad, Reem Alrashdan, Basheer Al-Duwairi, and Moayad Aloqaily (2021), "A Re-organizing Biosurveillance Framework Based on Fog and Mobile Edge Computing," *Multimedia Tools and Applications*, 80, 16805-16825.
- Alzoubi, Yehia Ibrahim, Ahmad Al-Ahmad, and Hasan Kahtan (2022), "Blockchain Technology as a Fog Computing Security and Privacy Solution: An Overview," *Computer Communications*, 182, 129-152.
- Antonini, Mattia, Massimo Vecchio, and Fabio Antonelli (2019), "Fog Computing Architectures: A Reference for Practitioners," *IEEE Internet of Things Magazine*, 2 (3), 19-25.
- Attiya, Ibrahim, Laith Abualigah, Doaa Elsadek, Samia Allaoua Chelloug, and Mohamed Abd Elaziz (2022), "An Intelligent Chimp Optimizer for Scheduling of IoT Application Tasks in Fog Computing," *Mathematics*, 10 (7), 1100, <https://doi.org/10.3390/math10071100>.
- Azizi, Sadoon, Mohammad Shojafar, Jemal Abawajy, and Rajkumar Buyya (2022), "Deadline-Aware and Energy-Efficient IoT Task Scheduling in Fog Computing Systems: A Semi-Greedy Approach," *Journal of Network and Computer Applications*, 201, 103333, <https://doi.org/10.1016/j.jnca.2022.103333>.
- Balasubramanian, S., and T. Meyyappan (2020), "Game Theory Based Offload and Migration-Enabled Smart Gateway for Cloud of Things in Fog Computing," *Computing in Engineering and Technology: Proceedings of ICCET 2019*, 253-266.
- Bashir, Hayat, Seonah Lee, and Kyong Hoon Kim (2019), "Resource Allocation Through Logistic Regression and Multicriteria Decision Making Method in IoT Fog Computing," *Transactions on Emerging Telecommunications Technologies*, 33 (2), <https://doi.org/10.1002/ett.3824>.

- Bilal, Kashif, Osman Khalid, Aiman Erbad, and Samee U. Khan (2018), “Potentials, Trends, and Prospects in Edge Technologies: Fog, Cloudlet, Mobile Edge, and Micro Data Centers,” *Computer Networks*, 130, 94-120.
- Bouachir, Ouns, Moayad Aloqaily, Lewis Tseng, and Azzedine Boukerche (2020), “Blockchain and Fog Computing for Cyberphysical Systems: The Case of Smart Industry,” *Computer*, 53 (9), 36-45.
- Buyya, Rajkumar, Satish Narayana Srirama, Giuliano Casale, Rodrigo Calheiros, Yogesh Simmhan, Blesson Varghese, Erol Gelenbe et al. (2018), “A Manifesto for Future Generation Cloud Computing: Research Directions for the Next Decade,” *ACM Computing Surveys (CSUR)*, 51 (5), 1-38.
- Chen, Siguang, Yimin Zheng, Weifeng Lu, Vijayakumar Varadarajan, and Kun Wang (2019), “Energy-Optimal Dynamic Computation Offloading for Industrial IoT in Fog Computing,” *IEEE Transactions on Green Communications and Networking*, 4 (2), 566-576.
- Costa, Breno, Joao Bachiega Jr, Leonardo Rebouças de Carvalho, and Aletheia PF Araujo (2022), “Orchestration in Fog Computing: A Comprehensive Survey,” *ACM Computing Surveys (CSUR)*, 55 (2), 1-34.
- Elwy, Fatema, Raafat Aburukba, and A. R. Al-Ali (2022), “Role of Fog Computing in Smart Spaces,” in *2022 IEEE International Conference on Edge Computing and Communications (EDGE)*, 69-76.

- Gasmi, Kaouther, Selma Dilek, Suleyman Tosun, and Suat Ozdemir (2022), “A Survey on Computation Offloading and Service Placement in Fog Computing-Based IoT,” *The Journal of Supercomputing*, 78 (2), 1983-2014.
- Ghobaei-Arani, Mostafa, Alireza Souri, and Ali A. Rahmanian (2019), “Resource Management Approaches in Fog Computing: A Comprehensive Review,” *Journal of Grid Computing*, 18 (1), 1–42.
- Goudarzi, Mohammad, Marimuthu Palaniswami, and Rajkumar Buyya (2022), “Scheduling IoT Applications in Edge and Fog Computing Environments: A Taxonomy and Future Directions,” *ACM Computing Surveys*, 55 (7), 1-41.
- Haghi Kashani, Mostafa, Amir Masoud Rahmani, and Nima Jafari Navimipour (2020), “Quality of Service-Aware Approaches in Fog Computing,” *International Journal of Communication Systems*, 33 (8), 1-34, <https://doi.org/10.1002/dac.4340>.
- Hallappanavar, Vijay L., and Mahantesh N. Birje (2021), “Prediction of Quality of Service of Fog Nodes for Service Recommendation in Fog Computing Based on Trustworthiness of Users,” *Journal of Reliable Intelligent Environments*, 8 (2), 193-210.
- Hamdi, Aisha Muhammad A., Farookh Khadeer Hussain, and Omar K. Hussain (2022), “Task Offloading in Vehicular Fog Computing: State-of-the-Art and Open Issues,” *Future Generation Computer Systems*, 133, 201-212.
- Hewa, Tharaka, An Braeken, Madhusanka Liyanage, and Mika Ylianttila (2022), “Fog Computing and Blockchain-Based Security Service Architecture for 5G Industrial IoT-Enabled Cloud Manufacturing,” *IEEE Transactions on Industrial Informatics*, 18 (10), 7174-7185.

Hosseinioun, Pejman, Maryam Kheirabadi, Seyed Reza Kamel Tabbakh, and Reza Ghaemi

(2022), “aTask Scheduling Approaches in Fog Computing: A Survey,” *Transactions on Emerging Telecommunications Technologies*, 33 (3), 1-11,  
<https://doi.org/10.1002/ett.3792>.

Idrees, Sara Kadhum, and Ali Kadhum Idrees (2022), “New Fog Computing Enabled Lossless EEG Data Compression Scheme in IoT networks,” *Journal of Ambient Intelligence and Humanized Computing*, 13, 3257-3270.

Jamil, Bushra, Humaira Ijaz, Mohammad Shojafar, Kashif Munir, and Rajkumar Buyya (2022), “Resource Allocation and Task Scheduling in Fog Computing and Internet of Everything Environments: A Taxonomy, Review, and Future Directions,” *ACM Computing Surveys (CSUR)*, 54 (11), 1-38.

Kamruzzaman, M. M., Bingxin Yan, Md Nazirul Islam Sarker, Omar Alruwaili, Min Wu, and Ibrahim Alrashdi (2022), “Blockchain and Fog Computing in IoT-Driven Healthcare Services for Smart Cities,” *Journal of Healthcare Engineering*, Article ID 9957888,  
<https://doi.org/10.1155/2022/9957888>.

Kashani, Mostafa Haghi, and Ebrahim Mahdipour (2022), “Load Balancing Algorithms in Fog Computing,” *IEEE Transactions on Services Computing*, 16 (2), 1505-1521.

Keshari, Niharika, Dinesh Singh, and Ashish Kumar Maurya (2022), “A Survey on Vehicular Fog Computing: Current State-of-the-Art and Future Directions,” *Vehicular Communications*, 38, 100512, <https://doi.org/10.1016/j.vehcom.2022.100512>.

Khezzr, Seyednima, Abdulsalam Yassine, and Rachid Benlamri (2022), “Towards a Secure and Dependable IoT Data Monetization Using Blockchain and Fog Computing,” *Cluster Computing*, 26 (2), 1551-1564.

Kumari, Aparna, Sudeep Tanwar, Sudhanshu Tyagi, and Neeraj Kumar (2018), “Fog Computing for Healthcare 4.0 Environment: Opportunities and Challenges,” *Computers & Electrical Engineering*, 72, 1-13.

Lata, Manju, and Vikas Kumar (2022), “Fog Computing Infrastructure for Smart City Applications,” in *Recent Advancements in ICT Infrastructure and Applications*, Manish Chaturvedi, Pankesh Patel, and Ramnarayan Yadav, eds. Springer Nature Singapore, 119-133.

Li, Yiran, Hongwei Li, Guowen Xu, Tao Xiang, and Rongxing Lu (2022), “Practical Privacy-Preserving Federated Learning in Vehicular Fog Computing,” *IEEE Transactions on Vehicular Technology*, 71 (5), 4692-4705.

Lin, Chuan, Guangjie Han, Xingyue Qi, Mohsen Guizani, and Lei Shu (2020), “A Distributed Mobile Fog Computing Scheme for Mobile Delay-Sensitive Applications in SDN-Enabled Vehicular Networks,” *IEEE Transactions on Vehicular Technology*, 69 (5), 5481-5493.

Liu, Chang, Jin Wang, Liang Zhou, and Amin Rezaeiapanah (2022), “Solving the Multi-Objective Problem of IoT Service Placement in Fog Computing Using Cuckoo Search Algorithm,” *Neural Processing Letters*, 54 (3), 1823-1854.

Liu, Yiming, F. Richard Yu, Xi Li, Hong Ji, and Victor CM Leung (2018), “Distributed Resource Allocation and Computation Offloading in Fog and Cloud Networks with Non-

- Orthogonal Multiple Access,” *IEEE Transactions on Vehicular Technology*, 67 (12), 12137-12151.
- Mahmud, Redowan, Ramamohanarao Kotagiri, and Rajkumar Buyya (2018), “Fog Computing: A Taxonomy, Survey and Future directions,” in *Internet of Everything: Algorithms, Methodologies, Technologies and Perspectives*, Benjamin Di Martino, Kuan-Ching Li, Laurence T. Yang, Antonio Esposito, eds. Springer, 103–130.
- Mahmud, Redowan, Samodha Pallewatta, Mohammad Goudarzi, and Rajkumar Buyya (2022), “Ifogsim2: An Extended iFogSim Simulator for Mobility, Clustering, and Microservice Management in Edge and Fog Computing Environments,” *Journal of Systems and Software*, 190, 111351, <https://doi.org/10.1016/j.jss.2022.111351>.
- Manzoor, Awais, Munam Ali Shah, Hasan Ali Khattak, Ikram Ud Din, and Muhammad Khurram Khan (2022), “Multi-Tier Authentication Schemes for Fog Computing: Architecture, Security Perspective, and Challenges,” *International Journal of Communication Systems*, 35 (12), 1-17, <https://doi.org/10.1002/dac.4033>.
- Mao, Wencan, Ozgur Umut Akgul, Abbas Mehrabi, Byungjin Cho, Yu Xiao, and Antti Ylä-Jääski (2022), “Data-Driven Capacity Planning for Vehicular Fog Computing,” *IEEE Internet of Things Journal*, 9 (15), 13179-13194.
- Mas, Lluís, Jordi Vilaplana, Jordi Mateo, and Francesc Solsona (2022), “A Queuing Theory Model for Fog Computing,” *The Journal of Supercomputing*, 78 (8), 11138-11155.
- Ometov, Aleksandr, Oliver Liombe Molua, Mikhail Komarov, and Jari Nurmi (2022), “A Survey of Security in Cloud, Edge, and Fog Computing,” *Sensors*, 22 (3), 927, <https://doi.org/10.3390/s22030927>.

- Rahimi, Morteza, Maryam Songhorabadi, and Mostafa Haghi Kashani (2020), “Fog-Based Smart Homes: A Systematic Review,” *Journal of Network and Computer Applications*, 153, 102531, <https://doi.org/10.1016/j.jnca.2020.102531>.
- Rahman, Gohar, and Chuah Wen Chai (2018), “Fog Computing, Applications, Security and Challenges, Review,” *International Journal of Engineering & Technology*, 7 (3), 1615-1621.
- Rani, Sita, Aman Kataria, and Meetal Chauhan (2022), “Fog computing in Industry 4.0: Applications and Challenges—A research roadmap,” in *Energy Conservation Solutions for Fog-Edge Computing Paradigms*, R. Tiwari, M. Mittal and L.M. Goyal, eds. Springer Nature Singapore, 173-190.
- Rayes, Ammar, and Samer Salam (2022), “Fog Computing,” in *Internet of Things from Hype to Reality: The Road to Digitization*, Ammar Rayes and Samer Salam, eds. Springer International Publishing, 153-178.
- Shakarami, Ali, Hamid Shakarami, Mostafa Ghobaei-Arani, Elaheh Nikougoftar, and Mohammad Faraji-Mehmandar (2022), “Resource Provisioning in Edge/Fog Computing: A Comprehensive and Systematic Review,” *Journal of Systems Architecture*, 122, 102362, <https://doi.org/10.1016/j.sysarc.2021.102362>.
- Sicari, Sabrina, Alessandra Rizzardi, and Alberto Coen-Porisini (2022), “Insights into Security and Privacy Towards Fog Computing Evolution,” *Computers & Security*, 120, 102822, <https://doi.org/10.1016/j.cose.2022.102822>.

- Singh, Simar Preet, Anand Nayyar, Rajesh Kumar, and Anju Sharma (2019), “Fog Computing: From Architecture to Edge Computing and Big Data Processing,” *The Journal of Supercomputing*, 75, 2070–2105.
- Songhorabadi, Maryam, Morteza Rahimi, Amir Mahdi Moghaddam Farid, and Mostafa Haghi Kashani (2020), “Fog Computing Approaches in Smart Cities: A State-of-the-Art Review,” *arXiv preprint arXiv:2011.14732*, <https://doi.org/10.48550/arXiv.2011.14732>.
- Wang, Tian, Jiyuan Zhou, Anfeng Liu, Md Zakirul Alam Bhuiyan, Guojun Wang, and Weijia Jia (2018), “Fog-Based Computing and Storage Offloading for Data Synchronization in IoT,” *IEEE Internet of Things Journal*, 6 (3), 4272-4282.
- Wang, Xiaojie, Zhaolong Ning, and Lei Wang (2018), “Offloading in Internet of Vehicles: A Fog-Enabled Real-Time Traffic Management System,” *IEEE Transactions on Industrial Informatics*, 14 (10), 4568-4578.
- Wu, Qiong, Hongmei Ge, Hanxu Liu, Qiang Fan, Zhengquan Li, and Ziyang Wang (2019), “A Task Offloading Scheme in Vehicular Fog and Cloud Computing System,” *IEEE Access*, 8, 1173-1184.
- Yadav, Ashish Mohan, Kuldeep Narayan Tripathi, and S. C. Sharma (2022), “A Bi-objective Task Scheduling Approach in Fog Computing Using Hybrid Fireworks Algorithm,” *The Journal of Supercomputing*, 78 (3), 4236-4260.
- Yadav, Ashish Mohan, Kuldeep Narayan Tripathi, and S. C. Sharma (2022), “An Enhanced Multi-Objective Fireworks Algorithm for Task Scheduling in Fog Computing Environment,” *Cluster Computing*, 25, 983-998.

- Yang, Yang, Ximeng Liu, Wenzhong Guo, Xianghan Zheng, Chen Dong, and Zhiquan Liu (2020), “Multimedia Access Control with Secure Provenance in Fog-Cloud Computing Networks,” *Multimedia Tools and Applications*, 79, 10701-10716.
- Yin, Zhenyu, Fulong Xu, Yue Li, Chao Fan, Feiqing Zhang, Guangjie Han, and Yuanguo Bi (2022), “A Multi-Objective Task Scheduling Strategy for Intelligent Production Line Based on Cloud-Fog Computing,” *Sensors*, 22 (4), 1555, <https://doi.org/10.3390/s22041555>.
- Yousefpour, Ashkan, Genya Ishigaki, Riti Gour, and Jason P. Jue (2018), “On Reducing IoT Service Delay Via Fog Offloading,” *IEEE Internet of Things Journal*, 5 (2), 998-1010.
